# Supplementary material for: High performance photodetectors based on In2S3, In2S1.5Se1.5 and In2Se3 nanostructures
Source: Royal Society of Chemistry journal article supplement (doi:10.1039/d3ma00808h), 2024-01-01
Supplement: d3ma00808h1.pdf [file d3ma00808h1.pdf]

## Supporting information

### High performance photodetectors based on $\text{In}_2\text{S}_3$ , $\text{In}_2\text{S}_{1.5}\text{Se}_{1.5}$ and $\text{In}_2\text{Se}_3$ nanostructures

Ankurkumar J. Khimani<sup>a\*</sup>, Sujit A. Kadam<sup>b\*</sup>, Ranjan Kr. Giri<sup>c</sup>, Chetan K. Zankat<sup>d</sup>, Yuan-Ron Ma<sup>b</sup>

<sup>a</sup>Department of Physics, Shri A. N. Patel P. G. Institute of Science and Research, Anand - 388001, Gujarat, India.

<sup>b</sup>Department of Physics, National Dong Hwa University, Hualien - 97401, Taiwan

<sup>c</sup>P. G. Department of Physics, Sardar Patel University, Vallabh Vidyanagar - 388120, Gujarat, India.

<sup>d</sup>Kamani Science College and Prataprai Arts College, Amreli – 365601, Gujarat, India.

Corresponding authors: \* [ankurkhimani@gmail.com](mailto:ankurkhimani@gmail.com), [ksujit17@gmail.com](mailto:ksujit17@gmail.com)

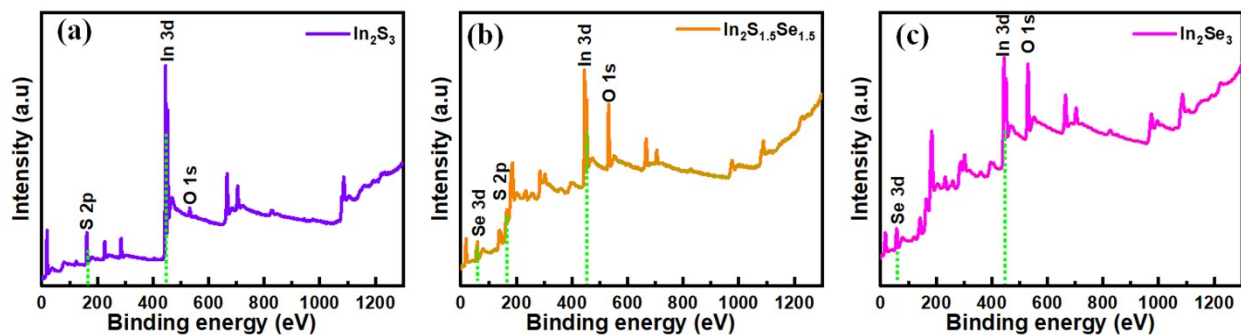

**Figure S1.** XPS survey spectrum of (a)  $\text{In}_2\text{S}_3$ , (b)  $\text{In}_2\text{S}_{1.5}\text{Se}_{1.5}$ , and (c)  $\text{In}_2\text{Se}_3$

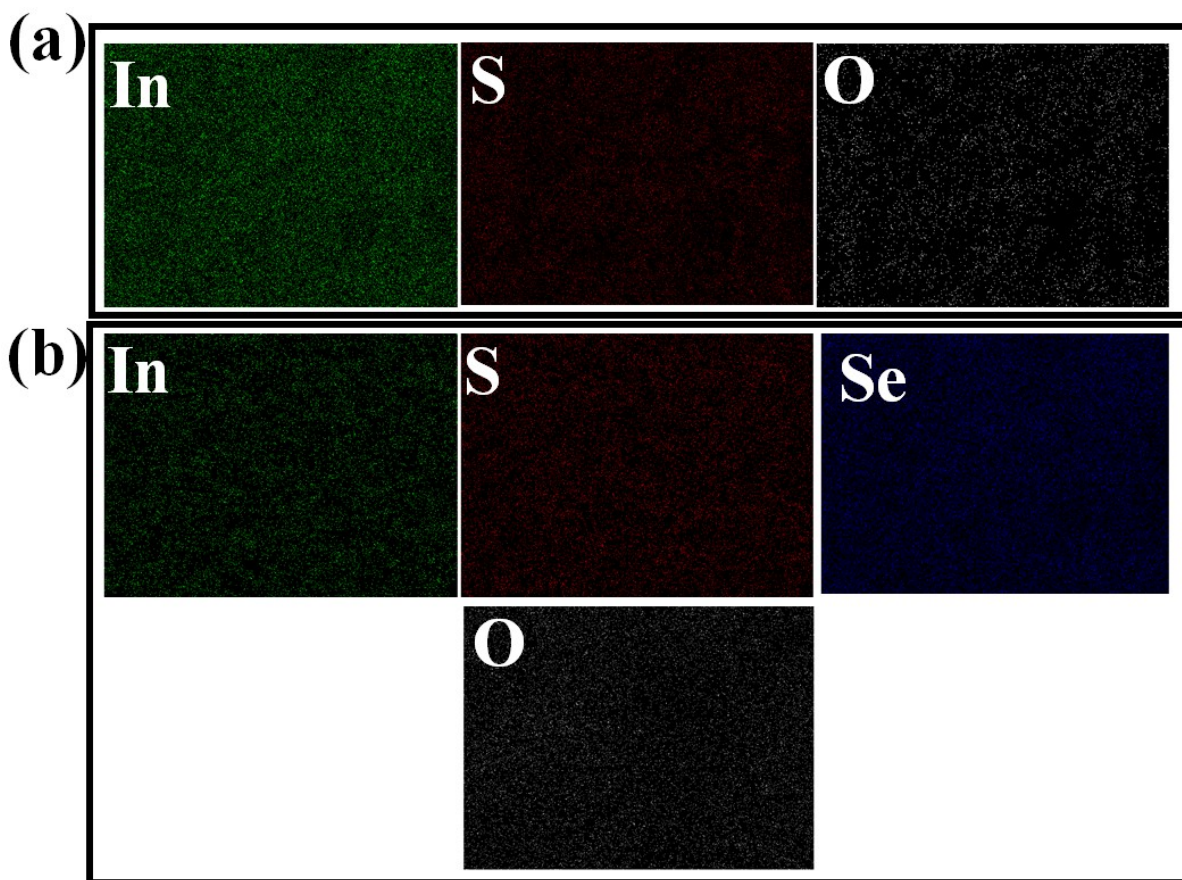

**Figure S2.** EDS mapping of (a)  $\text{In}_2\text{S}_3$ , and (b)  $\text{In}_2\text{S}_{1.5}\text{Se}_{1.5}$  nanostructures

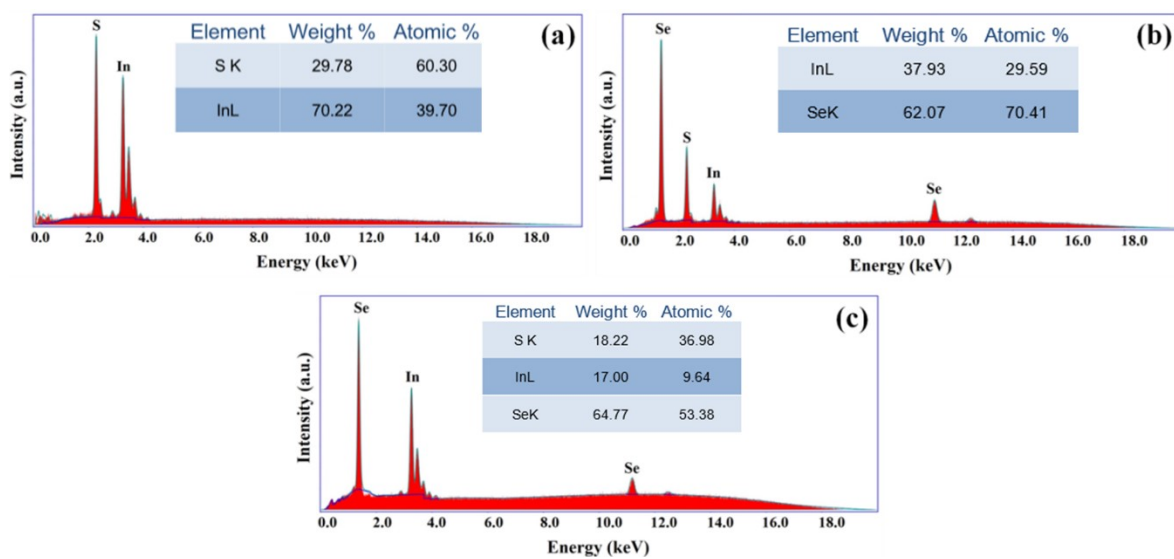

**Figure S3.** The EDS spectra of (a)  $\text{In}_2\text{S}_3$ , (b)  $\text{In}_2\text{S}_{1.5}\text{Se}_{1.5}$ , and (c)  $\text{In}_2\text{Se}_3$  nanostructures.

The morphological stability after photo-response studies is illustrated in **Figure S4**. No morphological changes were observed in the  $\text{In}_2\text{S}_3$ ,  $\text{In}_2\text{S}_{1.5}\text{Se}_{1.5}$ , and  $\text{In}_2\text{Se}_3$  nanostructures after photo detection application. This clearly indicates that  $\text{In}_2\text{S}_3$ ,  $\text{In}_2\text{S}_{1.5}\text{Se}_{1.5}$ , and  $\text{In}_2\text{Se}_3$  nanostructures are highly stable.

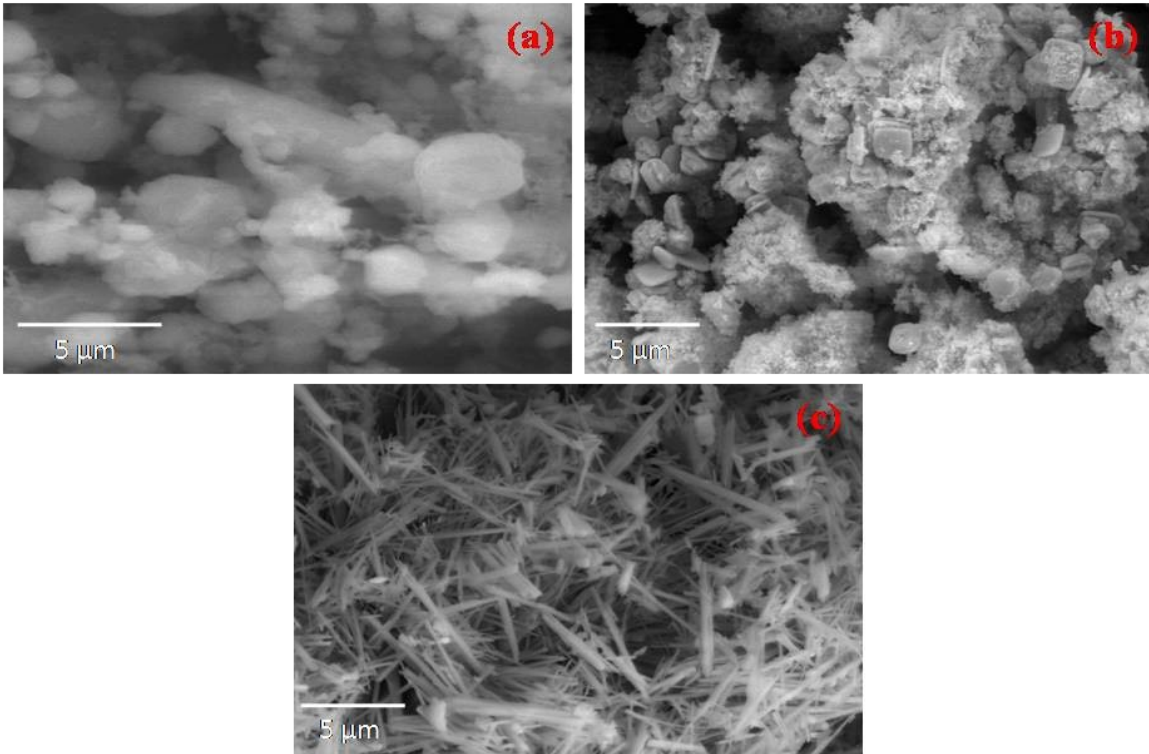

**Figure S4.** SEM images analysis after photo-response studies (a)  $\text{In}_2\text{S}_3$  nanostructures (b)  $\text{In}_2\text{S}_{1.5}\text{Se}_{1.5}$  nanostructures and (c)  $\text{In}_2\text{Se}_3$  nanofibers
